# Supplementary material for: Lanthanide co-doped paramagnetic spindle-like mesocrystals for imaging and autophagy induction
Source: Royal Society of Chemistry journal article supplement (doi:10.1039/c6nr03171d), 2016-01-01
Supplement: c6nr03171d1.pdf [file c6nr03171d1.pdf]

*Supporting Information*

**Lanthanide co-doped paramagnetic spindle-like  
mesocrystals for imaging and autophagy induction**

Yun-Jun Xu<sup>a,c,†</sup>, Jun Lin<sup>b,†</sup>, Yang Lu<sup>c,\*</sup>, Sheng-Liang Zhong<sup>d</sup>, Lei  
Wang<sup>d</sup>, Liang Dong<sup>a,c</sup>, Ya-Dong Wu<sup>c</sup>, Jun Peng<sup>a</sup>, Li Zhang<sup>b</sup>, Xiao-Feng  
Pan<sup>c</sup>, Wei Zhou<sup>b</sup>, Yang Zhao<sup>a</sup>, Long-Ping Wen<sup>b,\*</sup>, Shu-Hong Yu<sup>a,\*</sup>

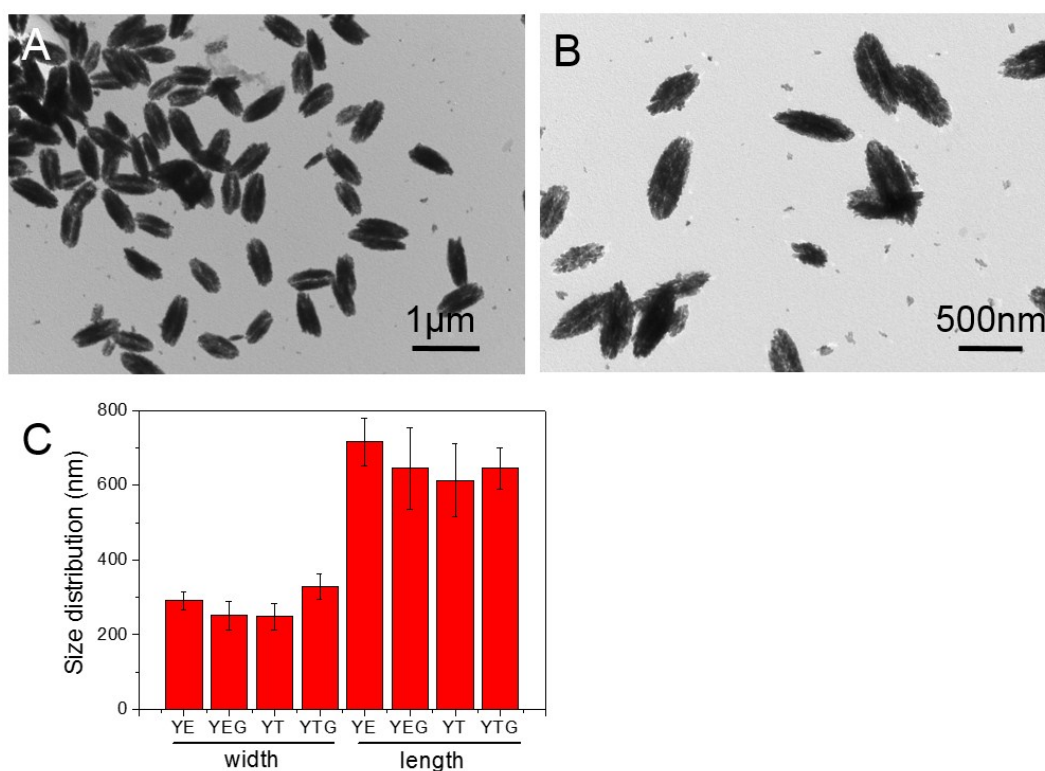

**Figure S1.** TEM of (A) YF<sub>3</sub>:CeEu and (B) YF<sub>3</sub>:CeTb spindle-like mesocrystals. (C) Size distribution of YF<sub>3</sub>:CeEu, YF<sub>3</sub>:CeTb, YEG and YTG spindle-like mesocrystals along the direction of long axis (length) and diameter (width).

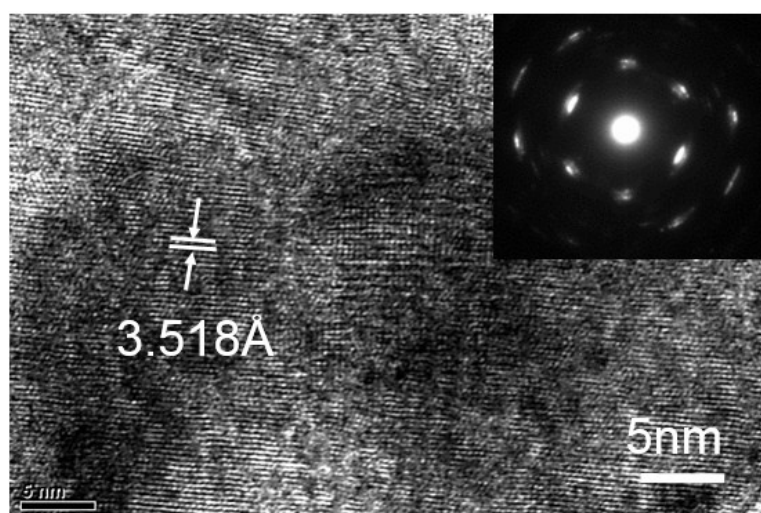

**Figure S2.** The high-resolution transmission electron microscopy (HRTEM) image performed on a YEG spindle shows a continuous crystal lattice with the d space of 3.518 Å, corresponding to the crystal plane of (020). In addition, the well-recognized periodic diffraction spots was observed in the selected area electron diffraction (SAED) image (inset image) indicated the single crystal-like diffraction behavior of our YEG spindle, confirming the oriented organization of smaller particles into spindle-like gadolinium co-doped YF<sub>3</sub> mesocrystals.

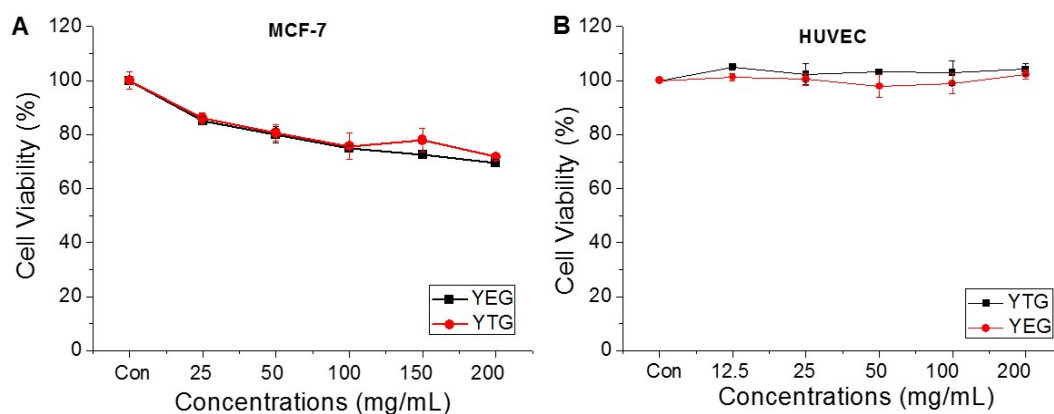

**Figure S3.** Cell viability of (A) MCF-7 cells (a breast cancer cell line) and (B) HUVEC cells (a human umbilical vein endothelial cell line) treated with different concentrations of YEG or YTG mesospindles for 24 h.

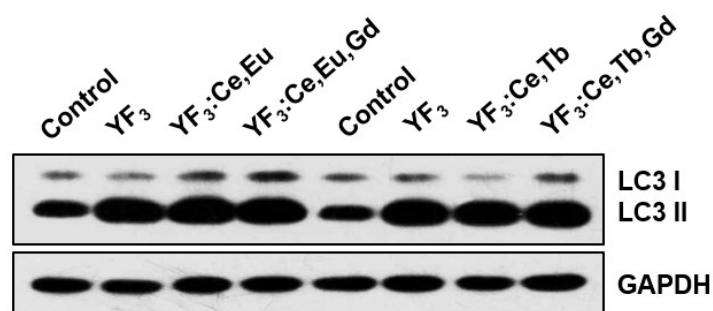

**Figure S4.** Western blotting of LC3 in HeLa cells treated with 100  $\mu$ g/mL mesospindles with different chemical compositions for 24h.
